# Supplementary material for: Transmission of Novel Influenza A(H1N1) in Households with Post-Exposure Antiviral Prophylaxis
Source: PubMed Central journal article supplement (PMC2898802; doi:10.1371/journal.pone.0011442), 2010-07-07
Supplement: pone.0011442.s001.pdf [file pone.0011442.s001.pdf]

Table S1. Likelihood contributions of the 47 households when assuming a fixed infectious period, and using an age classification of  $\leq 12$  versus  $> 12$  years of age.

| household nr | likelihood contribution                                                                                                                                               |
|--------------|-----------------------------------------------------------------------------------------------------------------------------------------------------------------------|
| 1            | $e^{-\beta_{11}-2\beta_{21}}$                                                                                                                                         |
| 2            | $e^{-\beta_{11}-3\beta_{21}}$                                                                                                                                         |
| 3            | $e^{-3\beta_{21}}$                                                                                                                                                    |
| 4            | $e^{-\beta_{11}-3\beta_{21}}$                                                                                                                                         |
| 5            | $2e^{-3\beta_{11}-4\beta_{21}} (e^{\beta_{11}} - 1)$                                                                                                                  |
| 6            | $e^{-3\beta_{21}}$                                                                                                                                                    |
| 7            | $e^{-2\beta_{21}}$                                                                                                                                                    |
| 8            | $e^{-3\beta_{21}}$                                                                                                                                                    |
| 9            | $e^{-2\beta_{21}}$                                                                                                                                                    |
| 10           | $e^{-2(\beta_{11}+\beta_{21})}$                                                                                                                                       |
| 11           | $e^{-5\beta_{21}}$                                                                                                                                                    |
| 12           | $e^{-\beta_{11}-2\beta_{21}}$                                                                                                                                         |
| 13           | $e^{-2\beta_{21}}$                                                                                                                                                    |
| 14           | $e^{-\beta_{22}}$                                                                                                                                                     |
| 15           | $e^{-\beta_{12}-2\beta_{22}}$                                                                                                                                         |
| 16           | $e^{-\beta_{22}}$                                                                                                                                                     |
| 17           | $e^{-\beta_{22}}$                                                                                                                                                     |
| 18           | $e^{-3\beta_{22}}$                                                                                                                                                    |
| 19           | $e^{-2\beta_{12}-\beta_{22}}$                                                                                                                                         |
| 20           | $e^{-\beta_{22}}$                                                                                                                                                     |
| 21           | $e^{-2\beta_{22}}$                                                                                                                                                    |
| 22           | $e^{-\beta_{22}}$                                                                                                                                                     |
| 23           | $e^{-3\beta_{22}}$                                                                                                                                                    |
| 24           | $e^{-2\beta_{22}}$                                                                                                                                                    |
| 25           | $e^{-\beta_{22}}$                                                                                                                                                     |
| 26           | $e^{-\beta_{22}}$                                                                                                                                                     |
| 27           | $e^{-3\beta_{22}}$                                                                                                                                                    |
| 28           | $e^{-3\beta_{22}}$                                                                                                                                                    |
| 29           | $e^{-4\beta_{22}}$                                                                                                                                                    |
| 30           | $e^{-\beta_{22}}$                                                                                                                                                     |
| 31           | $e^{-3\beta_{12}-\beta_{22}}$                                                                                                                                         |
| 32           | $e^{-\beta_{11}-2\beta_{12}-2\beta_{21}-\beta_{22}} (e^{\beta_{12}} - 1) (e^{\beta_{11}} + e^{\beta_{11}+\beta_{12}} - 2)$                                            |
| 33           | $e^{-\beta_{22}}$                                                                                                                                                     |
| 34           | $e^{-2\beta_{22}}$                                                                                                                                                    |
| 35           | $e^{-\beta_{12}-\beta_{21}-\beta_{22}} (e^{\beta_{12}} - 1)$                                                                                                          |
| 36           | $e^{-2\beta_{22}}$                                                                                                                                                    |
| 37           | $2e^{-\beta_{11}-2\beta_{12}} (e^{\beta_{12}} - 1)$                                                                                                                   |
| 38           | $e^{-3\beta_{22}}$                                                                                                                                                    |
| 39           | $e^{-2\beta_{22}}$                                                                                                                                                    |
| 40           | $e^{-\beta_{22}}$                                                                                                                                                     |
| 41           | $e^{-\beta_{22}}$                                                                                                                                                     |
| 42           | $e^{-\beta_{22}}$                                                                                                                                                     |
| 43           | $e^{-\beta_{22}}$                                                                                                                                                     |
| 44           | $e^{-2\beta_{12}-\beta_{22}}$                                                                                                                                         |
| 45           | $1 - e^{-\beta_{22}}$                                                                                                                                                 |
| 46           | $1 - e^{-\beta_{22}}$                                                                                                                                                 |
| 47           | $2e^{-2\beta_{12}-2\beta_{21}-3\beta_{22}} (e^{\beta_{12}} - 1) (e^{\beta_{21}+\beta_{22}} + e^{\beta_{12}+\beta_{21}+\beta_{22}} - e^{\beta_{12}} - e^{\beta_{21}})$ |
