# Supplementary material for: Transmission of Novel Influenza A(H1N1) in Households with Post-Exposure Antiviral Prophylaxis
Source: PLOS journal article supplement (doi:10.1371/journal.pone.0011442), 2010-07-07
Supplement: S2 (10.1371/journal.pone.0011442.s002) [file journal.pone.0011442.s002]

Table S2. Estimated secondary attack rates using an exponentially distributed infectious period

| model | estimated secondary attack rate (95%CI)                                                                        | number of parameters | AIC <sub>c</sub> | empirical support     |
|-------|----------------------------------------------------------------------------------------------------------------|----------------------|------------------|-----------------------|
| A     | y/o→y/o : 0.081 (0.038-0.15)                                                                                   | 1                    | 56.7             | 0.01<br>(weak)        |
| B     | y→y/o : 0.025 (0.0014-0.11)<br>o→y/o : 0.12 (0.053-0.25)                                                       | 2                    | 56.0             | 0.02<br>(weak)        |
| C     | y/o→y : 0.34 (0.11-0.58)<br>y/o→o : 0.035 (0.0083-0.090)                                                       | 2                    | 49.2             | 0.50<br>(substantial) |
| D     | y→y : 0.086 (0.0048-0.39)<br>y→o : 0.0073 (0.0032-0.051)<br>o→y : 0.49 (0.18-0.91)<br>o→o : 0.054 (0.013-0.15) | 3                    | 47.8             | 1<br>(strong)         |
| E     | y→y : 0.11 (0.0065-0.48)<br>y→o : 0 (0-0.061)<br>o→y : 0.45 (0.14-0.89)<br>o→o : 0.060 (0.015-0.16)            | 4                    | 49.6             | 0.41<br>(substantial) |

Household members are categorized as younger ( $\leq 12$  years of age, 'y') and older ( $> 12$  years of age, 'o'). The lay out and model scenarios are as in Table 1. Here, too, we find low transmission probabilities and strong statistical support for age-dependent susceptibility and infectiousness.
